# Supplementary material for: COVID-19 vaccination acceptance, safety and side-effects in European patients with severe asthma
Source: PubMed Central journal article supplement — ERJ Open Res. 2023 Nov 27;9(6):00590-2023. doi: 10.1183/23120541.00590-2023 (PMC10680029; doi:10.1183/23120541.00590-2023), 2023-11-27
Supplement: 00590-2023.SUPPLEMENT.pdf [file 00590-2023.SUPPLEMENT.pdf]

# COVID-19 vaccination, acceptance, safety, and side-effects in European patients with severe asthma

## Authors:

Apostolos Bossios<sup>1,2,3</sup>, Alison M. Bacon<sup>4</sup>, Katrien Eger<sup>5</sup>, Dóra Paróczai<sup>6</sup>, Florence Schleich<sup>7</sup>, Shane Hanon<sup>8</sup>, Svetlana Sergejeva<sup>9</sup>, Eleftherios Zervas<sup>10</sup>, Konstantinos Katsoulis<sup>11</sup>, Christina Aggelopoulou<sup>12</sup>, Konstantinos Kostikas<sup>12</sup>, Eleni Gaki<sup>12</sup>, Nikoletta Rovina<sup>13</sup>, Zsuzsanna Csoma<sup>14</sup>, Ineta Grisle<sup>15</sup>, Kristina Bieksienė<sup>16</sup>, Jolita Palacionyte<sup>16</sup>, Anneke ten Brinke<sup>17</sup>, Simone Hashimoto<sup>5</sup>, Florin Mihălțan<sup>18</sup>, Natalia Nenasheva<sup>19</sup>, Biljana Zvezdin<sup>20</sup>, Ivan Čekerevac<sup>21, 22</sup>, Sanja Hromiš<sup>20</sup>, Vojislav Ćupurdija<sup>21,22</sup>, Zorica Lazic<sup>21, 22</sup>, Rekha Chaudhuri<sup>23</sup>, Steven James Smith<sup>23</sup>, Hitasha Rupani<sup>24</sup>, Hans Michael Haitchi<sup>24</sup>, Ramesh Kurukulaaratchy<sup>24</sup>, Olivia Fulton<sup>25</sup>, Betty Frankemölle<sup>26</sup>, Peter Howarth<sup>27</sup>, Celeste Porsbjerg<sup>28</sup>, Elisabeth H. Bel<sup>5</sup>, Ratko Djukanovic<sup>24</sup>, Michael E. Hyland<sup>29</sup>.

## Affiliations:

<sup>1</sup> Karolinska Severe Asthma Center, Department of Respiratory Medicine and Allergy, Karolinska University Hospital, Huddinge, Sweden; <sup>2</sup> Department of Medicine, Huddinge, Karolinska Institutet, Stockholm, Sweden; <sup>3</sup> Division of Lung and Airway Research, Institute of Environmental Medicine, Karolinska Institutet, Stockholm, Sweden; <sup>4</sup> School of Psychology, University of Plymouth, Plymouth, United Kingdom; <sup>5</sup> Academic Medical Centre, University of Amsterdam, Amsterdam, The Netherlands; <sup>6</sup> Csongrad County Hospital and the Department of Pulmonology, University of Szeged, Szeged, Hungary; <sup>7</sup> CHU of Liege, Liege, Belgium; <sup>8</sup> University of Brussel, Brussel, Belgium Vrije Universiteit Brussel (VUB), Universitair Ziekenhuis Brussel (UZ Brussel), Brussels, Belgium; <sup>9</sup> The North Estonian Medical Centre, Tallinn, Estonia; <sup>10</sup> 7th Resp. Dept. Athens Chest Hospital, Athens, Greece; <sup>11</sup> Pulmonary Department, 424 Army General Hospital, Thessaloniki, Greece; <sup>12</sup> Respiratory

Medicine Department, University Hospital of Ioannina, Greece; <sup>13</sup> 1st Department of Pulmonary Medicine, "Sotiria" Hospital, Athens Medical School, National and Kapodistrian University of Athens, Athens, Greece; <sup>14</sup> National Koranyi Institute for Pulmonology, Budapest, Hungary ; <sup>15</sup> Riga East University Hospital, Riga, Latvia; <sup>16</sup> Lithuanian University of Health Science, Kaunas, Lithuania; <sup>17</sup> Medical Centre Leeuwarden, Leeuwarden, the Netherlands ; <sup>18</sup> National Institute of Pneumology, Bucharest, Romania ; <sup>19</sup> Russian Medical Academy of Continuous Professional Education of the Ministry of Healthcare of the Russian Federation, Moscow, Russian Federation ; <sup>20</sup> Institute for Pulmonary Diseases of Vojvodina, Sremska Kamenica, Serbia ; <sup>21</sup> Clinic for Pulmonology, University Clinical Center Kragujevac, Kragujevac, Serbia; <sup>22</sup> Department of Internal medicine, Faculty of Medical Sciences, University of Kragujevac, Kragujevac, Serbia; <sup>23</sup> Gartnavel General Hospital, Glasgow, United Kingdom; <sup>24</sup> Southampton University Hospital, Southampton, United Kingdom ; <sup>25</sup> European Lung Foundation, Patient Advisory Group, Edinburgh, United Kingdom ; <sup>26</sup> European Lung Foundation, Patient Advisory Group, Heemskerk, The Netherlands; <sup>27</sup> GSK, Brentford, Middlesex, United Kingdom; <sup>28</sup> Bispebjerg University Hospital, Copenhagen, Denmark; <sup>29</sup> Plymouth Marjon University, Plymouth, United Kingdom.

**Table S1** Title: Vaccination rates in each country.

|                    | <b>Patients<br/>n</b> | <b>Vaccination<br/>– all doses<br/>n (%)</b> | <b>Vaccination<br/>– one dose<br/>n (%)</b> |
|--------------------|-----------------------|----------------------------------------------|---------------------------------------------|
| Belgium            | 166                   | 79 (48)                                      | 63 (38)                                     |
| Estonia            | 43                    | 18 (42)                                      | 8 (19)                                      |
| France             | 1                     | 0                                            | 0                                           |
| Greece             | 104                   | 61 (59)                                      | 17 (16)                                     |
| Hungary            | 73                    | 54 (74)                                      | 12 (16)                                     |
| Latvia             | 23                    | 3 (13)                                       | 8 (35)                                      |
| Lithuania          | 24                    | 14 (58)                                      | 5 (21)                                      |
| Netherlands        | 62                    | 29 (47)                                      | 26 (42)                                     |
| Romania            | 11                    | 5 (45)                                       | 0                                           |
| Russian Federation | 19                    | 4 (21)                                       | 2 (11)                                      |
| Serbia             | 92                    | 52 (57)                                      | 7 (8)                                       |
| United Kingdom     | 42                    | 42 (100)                                     | 0                                           |
| All patients       | 660                   | 361(55)                                      | 148 (22)                                    |

**Footnote Table S1.** Vaccination rates (all doses and one dose) per country. Data are presented as n (%) for each participating country.
