# Supplementary material for: COVID-19 vaccination acceptance, safety and side-effects in European patients with severe asthma
Source: PubMed Central journal article supplement — ERJ Open Res. 2023 Nov 27;9(6):00590-2023. doi: 10.1183/23120541.00590-2023 (PMC10680029; doi:10.1183/23120541.00590-2023), 2023-11-27
Supplement: 00590-2023.SUPPLEMENT2.pdf [file 00590-2023.SUPPLEMENT2.pdf]

## Supplementary material

### COVID-19 vaccination, acceptance, safety and side-effects in European patients with severe asthma

Apostolos Bossios<sup>1,2,3</sup>, Alison M. Bacon<sup>4</sup>, Katrien Eger<sup>5</sup>, Dóra Paróczai<sup>6</sup>, Florence Schleich<sup>7</sup>, Shane Hanon<sup>8</sup>, Svetlana Sergejeva<sup>9</sup>, Eleftherios Zervas<sup>10</sup>, Konstantinos Katsoulis<sup>11</sup>, Christina Aggelopoulou<sup>12</sup>, Konstantinos Kostikas<sup>12</sup>, Eleni Gaki<sup>12</sup>, Nikoletta Rovina<sup>13</sup>, Zsuzsanna Csoma<sup>14</sup>, Ineta Grisle<sup>15</sup>, Kristina Bieksienė<sup>16</sup>, Jolita Palacionyte<sup>16</sup>, Anneke ten Brinke<sup>17</sup>, Simone Hashimoto<sup>5</sup>, Florin Mihălțan<sup>18</sup>, Natalia Nenasheva<sup>19</sup>, Biljana Zvezdin<sup>20</sup>, Ivan Čekerevac<sup>21,22</sup>, Sanja Hromiš<sup>20,23</sup>, Vojislav Čupurdija<sup>21,22</sup>, Zorica Lazic<sup>21,22</sup>, Rekha Chaudhuri<sup>24</sup>, Steven James Smith<sup>24</sup>, Hitasha Rupani<sup>25</sup>, Hans Michael Haitchi<sup>25</sup>, Ramesh Kurukulaaratchy<sup>25</sup>, Olivia Fulton<sup>26</sup>, Betty Frankemölle<sup>27</sup>, Peter Howarth<sup>28</sup>, Celeste Porsbjerg<sup>29</sup>, Elisabeth H. Bel<sup>5</sup>, Ratko Djukanovic<sup>25</sup> and Michael E. Hyland<sup>30</sup>

<sup>1</sup>Karolinska Severe Asthma Center, Department of Respiratory Medicine and Allergy, Karolinska University Hospital, Huddinge, Sweden; <sup>2</sup>Department of Medicine, Huddinge, Karolinska Institutet, Stockholm, Sweden; <sup>3</sup>Division of Lung and Airway Research, Institute of Environmental Medicine, Karolinska Institutet, Stockholm, Sweden; <sup>4</sup>School of Psychology, University of Plymouth, Plymouth, UK; <sup>5</sup>Academic Medical Center, University of Amsterdam, Amsterdam, The Netherlands; <sup>6</sup>Csongrad County Hospital and the Department of Pulmonology, University of Szeged, Szeged, Hungary; <sup>7</sup>CHU Liege, Liege, Belgium; <sup>8</sup>Respiratory Division, Universitair Ziekenhuis Brussel (UZ Brussel), Vrije Universiteit Brussel (VUB), Brussels, Belgium; <sup>9</sup>The North Estonian Medical Centre, Tallinn, Estonia; <sup>10</sup>7th Respiratory Department, Athens Chest Hospital, Athens, Greece; <sup>11</sup>Pulmonary Department, 424 Army General Hospital, Thessaloniki, Greece; <sup>12</sup>Respiratory Medicine Department, University Hospital of Ioannina, Greece; <sup>13</sup>1st Department of Pulmonary Medicine, "Sotiria" Hospital, Athens Medical School, National and Kapodistrian University of Athens, Athens, Greece; <sup>14</sup>National Koranyi Institute for Pulmonology, Budapest, Hungary; <sup>15</sup>Riga East University Hospital, Riga, Latvia; <sup>16</sup>Lithuanian University of Health Science, Kaunas, Lithuania; <sup>17</sup>Medical Centre Leeuwarden, Leeuwarden, The Netherlands; <sup>18</sup>National Institute of Pneumology, Bucharest, Romania; <sup>19</sup>Russian Medical Academy of Continuous Professional Education of the Ministry of Healthcare of the Russian Federation, Moscow, Russian Federation; <sup>20</sup>Institute for Pulmonary Diseases of Vojvodina, Sremska Kamenica, Serbia; <sup>21</sup>Clinic for Pulmonology, University Clinical Center Kragujevac, Kragujevac, Serbia; <sup>22</sup>Department of Internal Medicine, Faculty of Medical Sciences, University of Kragujevac, Kragujevac, Serbia; <sup>23</sup>Faculty of Medicine, University of Novi Sad, Novi Sad, Serbia; <sup>24</sup>Gartnavel General Hospital, Glasgow, UK; <sup>25</sup>Southampton University Hospital, Southampton, UK; <sup>26</sup>European Lung Foundation, Patient Advisory Group, Edinburgh, UK; <sup>27</sup>European Lung Foundation, Patient Advisory Group, Heemskerk, The Netherlands; <sup>28</sup>GSK, Brentford, Middlesex, UK; <sup>29</sup>Bispebjerg University Hospital, Copenhagen, Denmark; <sup>30</sup>Plymouth Marjon University, Plymouth, UK.

**Table S1** Title: Vaccination rates in each country.

|                    | <b>Patients<br/>n</b> | <b>Vaccination<br/>– all doses<br/>n (%)</b> | <b>Vaccination<br/>– one dose<br/>n (%)</b> |
|--------------------|-----------------------|----------------------------------------------|---------------------------------------------|
| Belgium            | 166                   | 79 (48)                                      | 63 (38)                                     |
| Estonia            | 43                    | 18 (42)                                      | 8 (19)                                      |
| France             | 1                     | 0                                            | 0                                           |
| Greece             | 104                   | 61 (59)                                      | 17 (16)                                     |
| Hungary            | 73                    | 54 (74)                                      | 12 (16)                                     |
| Latvia             | 23                    | 3 (13)                                       | 8 (35)                                      |
| Lithuania          | 24                    | 14 (58)                                      | 5 (21)                                      |
| Netherlands        | 62                    | 29 (47)                                      | 26 (42)                                     |
| Romania            | 11                    | 5 (45)                                       | 0                                           |
| Russian Federation | 19                    | 4 (21)                                       | 2 (11)                                      |
| Serbia             | 92                    | 52 (57)                                      | 7 (8)                                       |
| UK                 | 42                    | 42 (100)                                     | 0                                           |
| All patients       | 660                   | 361(55)                                      | 148 (22)                                    |

**Footnote Table S1.** Vaccination rates (all doses and one dose) per country. Data are presented as n (%) for each participating country.
